# Supplementary material for: Next-generation sequencing reveals frequent consistent genomic alterations in small cell undifferentiated lung cancer
Source: PubMed Central journal article supplement — J Clin Pathol. 2014 Jun 24;67(9):772–6. doi: 10.1136/jclinpath-2014-202447 (PMC4145440; doi:10.1136/jclinpath-2014-202447), 2014-06-24
Supplement: jclinpath-2014-202447-s1.pdf [file jclinpath-2014-202447-s1.pdf]

**Supplementary Table 1:** Characteristics and genomic alterations of SCLC specimens

| ID | TISSUE PROFILED | MEDIA<br>N<br>EXON<br>DEPT<br>H | GEN<br>D<br>ER | KNOWN SOMATIC SHORT-VARIANTS (PERCENT-READS,COVERAGE)                                                                                   | LIKELY INACTIVATING SHORT-VARIANTS (PERCENT-READS, COVERAGE) | HIGH-LEVEL (CN>8) AND FOCAL (CN>5) AMPLIFICATIONS | HOMOZYGOUS DELETIONS OF Known TSGs                                                             | LIKELY FUNCTIONAL REARRANGEMENTS |
|----|-----------------|---------------------------------|----------------|-----------------------------------------------------------------------------------------------------------------------------------------|--------------------------------------------------------------|---------------------------------------------------|------------------------------------------------------------------------------------------------|----------------------------------|
| 1  | Brain           | 711                             | F              | TP53_c.535C>T_p.H179Y(0.44,525)                                                                                                         | none                                                         | none                                              | none                                                                                           | none                             |
| 2  | Lymph Node      | 512                             | F              | EGFR_c.2235_2249delGGAATTAAGAGAAGC_p.E746_A750del(0.54,451),<br>PIK3CA_c.3140A>G_p.H1047R(0.79,622),<br>RB1_c.1901C>G_p.S634*(0.65,310) | none                                                         | none                                              | CDKN2A_loss(0, exons 5 of 5),<br>CDKN2B_loss(0, exons 5 of 5),<br>TP53_loss(0, exons 14 of 14) | none                             |
| 3  | Pleural         | 1298                            | F              | none                                                                                                                                    | none                                                         | MYCL1_amplification(                              | none                                                                                           | none                             |

|   |            |      |   |                                                                                                                                                   |                                                                                                            |                                                                                                                                                                       |                         |                                    |
|---|------------|------|---|---------------------------------------------------------------------------------------------------------------------------------------------------|------------------------------------------------------------------------------------------------------------|-----------------------------------------------------------------------------------------------------------------------------------------------------------------------|-------------------------|------------------------------------|
|   | Fluid      |      |   |                                                                                                                                                   |                                                                                                            | 30, exons 5 of 5)                                                                                                                                                     |                         |                                    |
| 4 | Lung       | 794  | M | TP53_c.844C>T_p.R282W(0.54, 737)                                                                                                                  | KDM6A_c.1183A>T_p.K395*(0.7,302),<br>MLL2_c.15631G>T_p.E5211*(0.35,943),<br>RB1_c.835A>T_p.K279*(0.51,264) | none                                                                                                                                                                  | none                    | none                               |
| 5 | Lymph Node | 1146 | F | TP53_c.659A>G_p.Y220C(0.83,830)                                                                                                                   | RB1_c.381-2A>G_p.splice(0.79,660)                                                                          | MYCL1_amplification(24, exons 5 of 5)                                                                                                                                 | none                    | SPEN_CTTNBP2N<br>L_truncation_3847 |
| 6 | Lung       | 1161 | F | TP53_c.752T>A_p.I251N(0.28,882)                                                                                                                   | none                                                                                                       | none                                                                                                                                                                  | none                    | none                               |
| 7 | Liver      | 1153 | F | CASP8_c.677C>T_p.S226L(0.09, 1164),<br>NFE2L2_c.187G>C_p.E63Q(0.54, 1312),<br>TP53_c.481G>T_p.A161S(0.73,847),<br>TP53_c.480G>T_p.M160I(0.73,861) | RB1_c.610G>T_p.E204*(0.71,651),<br>TSC2_c.3446_3447insC_p.L1150fs*18(0.4, 1043)                            | ZNF703_amplification(8, exons 2 of 2),<br>FGF10_amplification(9, exons 3 of 3),<br>FGFR1_amplification(8, exons 18 of 18),<br>RICTOR_amplification(9, exons 39 of 39) | none                    | none                               |
| 8 | Lung       | 845  | M | none                                                                                                                                              | MLL2_c.10867_10868insC_p.Q3623fs*52(0.67,641),<br>RB1_c.2501C>A_p.S834*(0.66,788)                          | none                                                                                                                                                                  | none                    | none                               |
| 9 | Chest Wall | 854  | F | none                                                                                                                                              | none                                                                                                       | none                                                                                                                                                                  | RB1_loss(0, exons 18 of | none                               |

|    |               |      |   |                                                                   |  |                                                                                   |      |                                                                             |                                    |
|----|---------------|------|---|-------------------------------------------------------------------|--|-----------------------------------------------------------------------------------|------|-----------------------------------------------------------------------------|------------------------------------|
|    |               |      |   |                                                                   |  |                                                                                   |      | 27)                                                                         |                                    |
| 10 | Mediastinum   | 1292 | M | none                                                              |  | MEN1_c.1258C>T_p.R420*(0.38,906)                                                  | none | none                                                                        | none                               |
| 11 | Lymph Node    | 887  | F | TP53_c.574C>T_p.Q192*(0.93,1219)                                  |  | none                                                                              | none | RB1_loss(0, exons 27 of 27)                                                 | none                               |
| 12 | Trachea       | 806  | M | none                                                              |  | none                                                                              | none | RB1_loss(0, exons 27 of 27)                                                 | none                               |
| 13 | Lymph Node    | 738  | F | CSF1R_c.110C>T_p.T37M(0.67,767)                                   |  | RB1_c.1499-1G>T_p.splice(0.99,564), TP53_c.920-2A>G_p.splice(0.97,583)            | none | none                                                                        | none                               |
| 14 | Lung          | 840  | M | TP53_c.707A>G_p.Y236C(0.04,923)                                   |  | LRP1B_c.5636C>G_p.S1879*(0.05,669), RB1_c.1681_1682insT_p.A562fs*10(0.05,641)     | none | none                                                                        | none                               |
| 15 | Bone          | 642  | M | none                                                              |  | ARID2_c.1176_1177delTG_p.C392fs*1(0.39,1053)                                      |      | CCND1_amplification(13, exons 5 of 5), CDK4_amplification(13, exons 7 of 7) | none                               |
| 16 | Liver         | 943  | F | CSF1R_c.95T>G_p.V32G(0.28,774)                                    |  | TP53_c.920-1G>T_p.splice(0.54,1079)                                               | none | none                                                                        | none                               |
| 17 | Pleural Fluid | 769  | F | BRAF_c.1406G>T_p.G469V(0.43,849), TP53_c.892G>T_p.E298*(0.79,557) |  | MLL2_c.12025_12025delT_p.S4010fs*12(0.42,923), RB1_c.1215+1G>T_p.splice(0.79,485) | none | none                                                                        | KIT_intergenicRegion_truncation_12 |

|    |                 |     |   |                                                                                                           |                                                                                       |                                                                                 |                             |                                                                         |
|----|-----------------|-----|---|-----------------------------------------------------------------------------------------------------------|---------------------------------------------------------------------------------------|---------------------------------------------------------------------------------|-----------------------------|-------------------------------------------------------------------------|
| 18 | Small Intestine | 696 | M | TP53_c.743G>C_p.R248P(0.73,657)                                                                           | none                                                                                  | MCL1_amplification(8, exons 5 of 5)                                             | PTEN_loss(0, exons 4 of 9)  | none                                                                    |
| 19 | Lung            | 597 | M | TP53_c.1006G>T_p.E336*(0.62,343)                                                                          | APC_c.1774_1792delTTATGGAATTTGTCA<br>GCAC_p.L592fs*12(0.68,291)                       | MYST3_amplification(6, exons 16 of 16)                                          | none                        | none                                                                    |
| 20 | Lung            | 617 | F | TP53_c.853G>A_p.E285K(0.26,739)                                                                           | BRCA2_c.9976A>T_p.K3326*(0.64,801),<br>NOTCH1_c.5527_5528insGT_p.W1843fs*45(0.18,534) | RICTOR_amplification(7, exons 39 of 39)                                         | none                        | none                                                                    |
| 21 | Lung            | 730 | M | TP53_c.746G>T_p.R249M(0.93,626)                                                                           | RB1_c.2520+1G>A_p.splice(0.95,582),<br>TSC1_c.2851C>T_p.Q951*(0.45,638)               | ARFRP1_amplification(7, exons 6 of 6)                                           | none                        | none                                                                    |
| 22 | Brain           | 576 | F | none                                                                                                      | none                                                                                  | KRAS_amplification(6, exons 5 of 5)                                             | none                        | MLL2_TM9SF2_rearrangement_237,<br>BRCA2_intergenicRegion_truncation_226 |
| 23 | Lung            | 563 | F | TP53_c.839G>C_p.R280T(0.37,484)                                                                           | ATRX_c.3910G>T_p.G1304*(0.28,566),<br>MLL2_c.3398C>G_p.S1133*(0.3,672)                | none                                                                            | none                        | none                                                                    |
| 24 | Brain           | 672 | F | TP53_c.734G>T_p.G245V(0.95,751)                                                                           | RB1_c.2438_2439insT_p.K814fs*1(0.87,582)                                              | none                                                                            | none                        | none                                                                    |
| 25 | Pleura          | 684 | F | BRIP1_c.587A>G_p.N196S(0.66,929),<br>EGFR_c.2573T>G_p.L858R(0.25,897),<br>TP53_c.892G>T_p.E298*(0.84,454) | none                                                                                  | CCND3_amplification(10, exons 5 of 5),<br>IRS2_amplification(13, exons 5 of 5), | RB1_loss(0, exons 10 of 27) | none                                                                    |

|    |            |     |   |                                                                                                                                                |                                                                                             |  |                                                                                                                          |                             |      |
|----|------------|-----|---|------------------------------------------------------------------------------------------------------------------------------------------------|---------------------------------------------------------------------------------------------|--|--------------------------------------------------------------------------------------------------------------------------|-----------------------------|------|
|    |            |     |   |                                                                                                                                                |                                                                                             |  | MYC_amplification(12, exons 5 of 5),<br>PIK3CA_amplification(7, exons 20 of 20),<br>SOX2_amplification(12, exons 5 of 5) |                             |      |
| 26 | Lymph Node | 770 | F | MLL2_c.7829T>C_p.L2610P(0.51,998),<br>RB1_c.1666C>T_p.R556*(0.89,498),<br>STAG2_c.914G>T_p.R305L(0.42,783),<br>TP53_c.772G>A_p.E258K(0.94,781) | NOTCH3_c.4903G>T_p.E1635*(0.49,542)                                                         |  | MYCN_amplification(24, exons 5 of 5)                                                                                     | none                        | none |
| 27 | Lymph Node | 630 | M | TP53_c.892G>T_p.E298*(0.95,613)                                                                                                                | none                                                                                        |  | none                                                                                                                     | none                        | none |
| 28 | Lymph Node | 660 | F | TP53_c.535C>T_p.H179Y(0.89,521)                                                                                                                | MAP3K1_c.237_240delCCTT_p.F79fs*105(1.0,75)                                                 |  | none                                                                                                                     | RB1_loss(0, exons 4 of 27)  | none |
| 29 | Lymph Node | 493 | F | TP53_c.404G>T_p.C135F(0.87,656)                                                                                                                | MLL2_c.3578_3578delC_p.T1195fs*17(0.52,940),<br>SPEN_c.6369_6370delAA_p.S2124fs*1(0.57,778) |  | none                                                                                                                     | RB1_loss(0, exons 15 of 27) | none |
| 3  | Lung       | 623 | F | none                                                                                                                                           | RB1_c.1498+2T>C_p.splice(0.48,582),                                                         |  | none                                                                                                                     | none                        | none |

|        |      |     |   |                                                                        |                                                                                        |                                                                                                           |                                                              |      |
|--------|------|-----|---|------------------------------------------------------------------------|----------------------------------------------------------------------------------------|-----------------------------------------------------------------------------------------------------------|--------------------------------------------------------------|------|
| 0      |      |     |   |                                                                        | TP53_c.783-1G>T_p.splice(0.5,519)                                                      |                                                                                                           |                                                              |      |
| 3<br>1 | Lung | 617 | F | TP53_c.716A>C_p.N239T(0.66,652),<br>VHL_c.556G>A_p.E186K(0.21,560)     | none                                                                                   | MYC_amplification(16, exons 5 of 5),<br>MYCL1_amplification(16, exons 5 of 5)                             | none                                                         | none |
| 3<br>2 | Lung | 706 | F | MLL2_c.6496C>T_p.Q2166*(0.25,561)                                      | RB1_c.2331_2331delT_p.T778fs*32(0.27,670),<br>TP53_c.954_954delA_p.K319fs*26(0.48,760) | EPHA3_amplification(8, exons 17 of 17)                                                                    | none                                                         | none |
| 3<br>3 | Lung | 720 | F | CREBBP_c.1399G>A_p.A467T(0.91,561),<br>TP53_c.536A>G_p.H179R(0.83,509) | TSC1_c.2813+2T>G_p.splice(0.22,165)                                                    | none                                                                                                      | RB1_loss(0, exons 15 of 27),<br>TSC1_loss(0, exons 21 of 21) | none |
| 3<br>4 | Lung | 665 | F | TP53_c.734G>T_p.G245V(0.6,772)                                         | none                                                                                   | NKX2-1_amplification(8, exons 5 of 5),<br>EPHB1_amplification(9, exons 16 of 16),<br>PIK3CA_amplification | none                                                         | none |

|    |               |     |   |                                                                 |                                                                                                                                                             |                                                                                                                                         |              |                               |
|----|---------------|-----|---|-----------------------------------------------------------------|-------------------------------------------------------------------------------------------------------------------------------------------------------------|-----------------------------------------------------------------------------------------------------------------------------------------|--------------|-------------------------------|
|    |               |     |   |                                                                 |                                                                                                                                                             | n(9, exons 20 of 20), SOX2_amplification(9, exons 5 of 5), FGF12_amplification(9, exons 6 of 6), EPHA3_amplification(9, exons 17 of 17) |              |                               |
| 35 | Lung          | 807 | F | PTEN_c.274G>C_p.D92H(0.82,383), TP53_c.733G>T_p.G245C(0.81,547) | ATRX_c.6631G>T_p.E2211*(0.37,718), KIT_c.1078_1078delG_p.E360fs*15(0.37,756), NCOR1_c.26_27insA_p.N9fs*34(0.09,1168), NOTCH4_c.5299-1G>T_p.splice(0.52,530) | none                                                                                                                                    | none         | none                          |
| 36 | Pleural Fluid | 551 | M | TP53_c.475G>C_p.A159P(0.25,803)                                 | LRP1B_c.2377C>T_p.Q793*(0.19,96), RB1_c.118G>T_p.E40*(0.26,368)                                                                                             | MYCL1_amplification(12, exons 5 of 5)                                                                                                   | none         | none                          |
| 37 | Lymph Node    | 661 | M | TP53_c.584T>G_p.I195S(0.64,565)                                 | RB1_c.2106+1G>A_p.splice(0.65,444)                                                                                                                          | PIK3CA_amplification(7, exons 20 of 20), SOX2_amplification(7, exons 5 of 5)                                                            | none         | none                          |
| 38 | Lung          | 757 | M | none                                                            | FLT3_c.2757C>A_p.Y919*(0.74,407), RB1_c.1154T>G_p.L385*(0.73,456)                                                                                           | none                                                                                                                                    | TP53_loss(0, | RUNX1_CLIC6_transcription_118 |

|    |       |     |   |                                                                                                                                                                                                                                         |                                    |                                                                                                                             |                             |      |
|----|-------|-----|---|-----------------------------------------------------------------------------------------------------------------------------------------------------------------------------------------------------------------------------------------|------------------------------------|-----------------------------------------------------------------------------------------------------------------------------|-----------------------------|------|
|    |       |     |   |                                                                                                                                                                                                                                         |                                    |                                                                                                                             | exons<br>4 of<br>15)        |      |
| 39 | Liver | 708 | M | AKT1_c.118G>A_p.E40K(0.64,939),<br>AKT1_c.49G>A_p.E17K(0.65,674),<br>CTNNB1_c.94G>A_p.D32N(0.46,819),<br>TP53_c.799C>G_p.R267G(0.92,695)                                                                                                | none                               | none                                                                                                                        | none                        | none |
| 40 | Lung  | 662 | M | TP53_c.475G>C_p.A159P(0.98,859)                                                                                                                                                                                                         | RB1_c.2306T>A_p.L769*(0.92,425)    | none                                                                                                                        | none                        | none |
| 41 | Lung  | 750 | M | EGFR_c.2369C>T_p.T790M(0.09,918),<br>EGFR_c.2573T>G_p.L858R(0.36,890),<br>GRIN2A_c.4185G>A_p.A1395A(0.01,1071),<br>PIK3R1_c.2045C>T_p.A682V(0.01,1107),<br>RB1_c.1236_1236delA_p.E413fs*4(0.78,699),<br>TP53_c.844C>T_p.R282W(0.88,941) | none                               | EPHB1_amplification(8, exons 16 of 16),<br>RICTOR_amplification(8, exons 39 of 39),<br>FGF10_amplification(8, exons 3 of 3) | none                        | none |
| 42 | Lung  | 711 | F | TP53_c.475G>C_p.A159P(0.65,1039),<br>VHL_c.74C>T_p.P25L(0.81,906)                                                                                                                                                                       | TNFRSF14_c.136G>T_p.E46*(0.18,890) | none                                                                                                                        | none                        | none |
| 43 | Lung  | 610 | M | MSH6_c.1526T>C_p.V509A(0.4,610),<br>TP53_c.796G>T_p.G266*(0.9,521)                                                                                                                                                                      | none                               | FGFR3_amplification(8, exons 17 of 17),<br>RICTOR_amplification                                                             | RB1_loss(0, exons 27 of 27) | none |



|        |       |     |   |                                                                                                                        |                                                                                 |                                                                                                                                                              |      |      |
|--------|-------|-----|---|------------------------------------------------------------------------------------------------------------------------|---------------------------------------------------------------------------------|--------------------------------------------------------------------------------------------------------------------------------------------------------------|------|------|
|        |       |     |   |                                                                                                                        |                                                                                 | n(13, exons 39 of 39), FGF10_amplification(13, exons 3 of 3), MYST3_amplification(9, exons 16 of 16)                                                         |      |      |
| 4<br>4 | Liver | 624 | F | CBL_c.1139T>C_p.L380P(0.14,435)                                                                                        | none                                                                            | CCND1_amplification(156, exons 5 of 5), FGF19_amplification(156, exons 3 of 3), MYCL1_amplification(25, exons 5 of 5), MET_amplification(11, exons 20 of 20) | none | none |
| 4<br>5 | Lung  | 684 | F | GATA3_c.322A>T_p.T108S(0.76,288),<br>PTCH1_c.3724G>A_p.E1242K(0.49,726),<br>TP53_c.455_457CGG>TT_p.G154fs*16(0.81,407) | KDM6A_c.1958_1958delG_p.G653fs*38(0.47,664),<br>RB1_c.1411C>T_p.Q471*(0.68,268) | none                                                                                                                                                         | none | none |
| 4      | Liver | 407 | M | FAM46C_c.205G>A_p.V69I(0.33)                                                                                           | none                                                                            | RICTOR_a                                                                                                                                                     | none | none |

|        |               |     |   |                                                                            |                                                                                                                       |                                                                                                        |                                                |      |
|--------|---------------|-----|---|----------------------------------------------------------------------------|-----------------------------------------------------------------------------------------------------------------------|--------------------------------------------------------------------------------------------------------|------------------------------------------------|------|
| 6      |               |     |   | ,615),<br>TP53_c.503A>G_p.H168R(0.95,<br>468)                              |                                                                                                                       | mplificatio<br>n(6, exons<br>39 of 39),<br>FGF10_am<br>plification(<br>6, exons 3<br>of 3)             |                                                |      |
| 4<br>7 | Lymph<br>Node | 678 | F | none                                                                       | BCOR_c.182_182delC_p.H62fs*9(0.13,463<br>, RB1_c.1498+0insA_p.splice(0.37,702),<br>TP53_c.375+1G>T_p.splice(0.48,406) | RICTOR_a<br>mplificatio<br>n(9, exons<br>39 of 39)                                                     | none                                           | none |
| 4<br>8 | Lung          | 675 | F | none                                                                       | none                                                                                                                  | none                                                                                                   | RAD51<br>_loss(<br>0,<br>exons<br>10 of<br>10) | none |
| 4<br>9 | Lymph<br>Node | 635 | F | none                                                                       | none                                                                                                                  | RICTOR_a<br>mplificatio<br>n(9, exons<br>39 of 39),<br>FGF10_am<br>plification(<br>9, exons 3<br>of 3) | none                                           | none |
| 5<br>0 | Lymph<br>Node | 747 | M | IDH1_c.394C>T_p.R132C(0.13,7<br>76)                                        | MEN1_c.883G>T_p.E295*(0.44,783),<br>MEN1_c.647_647delT_p.V216fs*13(0.39,<br>661)                                      | none                                                                                                   | none                                           | none |
| 5<br>1 | Lung          | 733 | F | CSF1R_c.95T>G_p.V32G(0.99,47<br>2),<br>TP53_c.913A>T_p.K305*(0.97,5<br>15) | RB1_c.2425_2425delC_p.L809fs*1(0.93,4<br>27)                                                                          | none                                                                                                   | none                                           | none |
| 5<br>2 | Brain         | 494 | M | PAX5_c.77T>G_p.V26G(0.48,71<br>8),                                         | none                                                                                                                  | none                                                                                                   | none                                           | none |

|    |               |     |   |                                                                                                                                                 |                                                                                                 |                                     |                             |      |
|----|---------------|-----|---|-------------------------------------------------------------------------------------------------------------------------------------------------|-------------------------------------------------------------------------------------------------|-------------------------------------|-----------------------------|------|
|    |               |     |   | PIK3CA_c.1633G>A_p.E545K(0.26,471),<br>TP53_c.845G>C_p.R282P(0.79,554)                                                                          |                                                                                                 |                                     |                             |      |
| 53 | Liver         | 638 | M | TP53_c.757A>C_p.T253P(0.76,528)                                                                                                                 | RB1_c.460A>T_p.K154*(0.83,722)                                                                  | none                                | none                        | none |
| 54 | Head and Neck | 640 | M | DDR2_c.2417G>A_p.R806Q(0.48,707),<br>NOTCH1_c.4780C>T_p.R1594W(0.5,818),<br>TP53_c.818G>A_p.R273H(0.5,854),<br>TP53_c.581T>A_p.L194H(0.52,1028) | RB1_c.2196_2205delTCATGCTGTT_p.H733fs*8(0.95,150)                                               | none                                | none                        | none |
| 55 | Liver         | 561 | M | EP300_c.2773C>A_p.P925T(0.18,396),<br>TP53_c.404G>T_p.C135F(0.55,432)                                                                           | MLL2_c.12340G>T_p.G4114*(0.36,749)                                                              | none                                | none                        | none |
| 56 | Liver         | 604 | M | GATA2_c.1437G>T_p.M479I(0.6,869),<br>TP53_c.404G>A_p.C135Y(0.7,329)                                                                             | RB1_c.71_71delC_p.P24fs*41(0.73,217)                                                            | MCL1_amplification(6, exons 5 of 5) | none                        | none |
| 57 | Lymph Node    | 769 | M | none                                                                                                                                            | LRP1B_c.8561_8576delATGGGCGGTGTCTTCT_p.D2854fs*22(0.37,819), TP53_c.783-2A>G_p.splice(0.92,457) | none                                | none                        | none |
| 58 | Liver         | 778 | F | TP53_c.574C>T_p.Q192*(0.69,1027)                                                                                                                | none                                                                                            | none                                | RB1_loss(0, exons 27 of 27) | none |
| 59 | Lung          | 764 | F | TP53_c.643A>G_p.S215G(0.95,532)                                                                                                                 | none                                                                                            | none                                | none                        | none |
| 60 | Lymph Node    | 690 | F | RB1_c.1303G>T_p.G435*(0.49,673),                                                                                                                | none                                                                                            | none                                | none                        | none |

|    |            |     |   |                                                                   |                                                                                                                                                                                                              |                                                                                                                                                      |                                                               |      |
|----|------------|-----|---|-------------------------------------------------------------------|--------------------------------------------------------------------------------------------------------------------------------------------------------------------------------------------------------------|------------------------------------------------------------------------------------------------------------------------------------------------------|---------------------------------------------------------------|------|
|    | Node       |     |   | TP53_c.112C>T_p.Q38*(0.35,532)                                    |                                                                                                                                                                                                              |                                                                                                                                                      |                                                               |      |
| 61 | Lung       | 604 | F | KRAS_c.35G>A_p.G12D(0.12,679),<br>TP53_c.423C>G_p.C141W(0.63,449) | MLL2_c.1934_1934delC_p.P647fs*283(0.4,602), RB1_c.2486C>A_p.S829*(0.52,314)                                                                                                                                  | none                                                                                                                                                 | none                                                          | none |
| 62 | Lung       | 823 | F | none                                                              | TP53_c.375+1G>A_p.splice(0.63,460)                                                                                                                                                                           | none                                                                                                                                                 | none                                                          | none |
| 63 | Lymph Node | 735 | M | TP53_c.747G>C_p.R249S(0.74,800)                                   | LRP1B_c.1564G>T_p.E522*(0.2,665),<br>NF1_c.6820-1G>T_p.splice(0.67,444)                                                                                                                                      | none                                                                                                                                                 | CDKN2A_loss(0, exons 5 of 5),<br>CDKN2B_loss(0, exons 5 of 5) | none |
| 64 | Lung       | 693 | F | none                                                              | ARID1A_c.1358_1358delC_p.P453fs*166(0.13,636),<br>ASXL1_c.1934_1934delG_p.G645fs*58(0.22,643), RB1_c.2326-2A>C_p.splice(0.29,775), RB1_c.2326-1G>T_p.splice(0.29,774),<br>TP53_c.782+1G>A_p.splice(0.23,503) | RICTOR_amplification(8, exons 39 of 39),<br>FGF10_amplification(8, exons 3 of 3),<br>ZNF703_amplification(11, exons 2 of 2),<br>FGFR1_amplification( | PTEN_loss(0, exons 4 of 9)                                    | none |

|    |      |     |   |                                   |                                                                                                                                                            |                                                                                                                                                                |                             |      |
|----|------|-----|---|-----------------------------------|------------------------------------------------------------------------------------------------------------------------------------------------------------|----------------------------------------------------------------------------------------------------------------------------------------------------------------|-----------------------------|------|
|    |      |     |   |                                   |                                                                                                                                                            | 11, exons 18 of 18), MYST3_amplification(16, exons 16 of 16)                                                                                                   |                             |      |
| 65 | Lung | 668 | F | KIT_c.1658A>G_p.Y553C(0.69,851)   | NOTCH2_c.5214-2A>G_p.splice(0.55,310)                                                                                                                      | MAP2K1_amplification(8, exons 11 of 11), PDGFRA_amplification(18, exons 34 of 34), KIT_amplification(13, exons 21 of 21), KDR_amplification(7, exons 30 of 30) | TP53_loss(0, exons 9 of 14) | none |
| 66 | Lung | 685 | F | MLL2_c.6496C>T_p.Q2166*(0.62,557) | RB1_c.2331_2331delT_p.T778fs*32(0.89,595), TP53_c.954_956AAA>AT_p.K319fs*26(0.92,837)                                                                      | MYC_amplification(161, exons 5 of 5)                                                                                                                           | none                        | none |
| 67 | Lung | 853 | M | none                              | BRCA2_c.9976A>T_p.K3326*(0.18,845), MLL2_c.15715_15715delC_p.P5239fs*4(0.55,842), RB1_c.1840A>T_p.K614*(0.66,625), TP53_c.262_263insC_p.S90fs*59(0.42,522) | MYC_amplification(19, exons 5 of 5), ZNF703_amplification(8, exons                                                                                             | none                        | none |

|    |            |     |   |                                                                              |                                                                                |                                                                                                                       |                             |      |
|----|------------|-----|---|------------------------------------------------------------------------------|--------------------------------------------------------------------------------|-----------------------------------------------------------------------------------------------------------------------|-----------------------------|------|
|    |            |     |   |                                                                              |                                                                                | 2 of 2),<br>FGFR1_amplification(8, exons 18 of 18),<br>MYST3_amplification(8, exons 16 of 16)                         |                             |      |
| 68 | Lung       | 722 | M | TP53_c.298C>T_p.Q100*(0.87,744)                                              | BRCA2_c.9976A>T_p.K3326*(0.39,1020),<br>RB1_c.116_116delC_p.P39fs*26(0.75,260) | none                                                                                                                  | none                        | none |
| 69 | Lung       | 179 | M | TP53_c.430C>T_p.Q144*(0.76,117)                                              | MLL2_c.2317C>T_p.Q773*(0.43,180)                                               | SOX2_amplification(8, exons 1 of 1),<br>KIT_amplification(8, exons 21 of 21),<br>KDR_amplification(8, exons 30 of 30) | none                        | none |
| 70 | Lymph Node | 550 | M | KIT_c.1508A>G_p.Y503C(0.21,656),<br>TP53_c.423_423delC_p.P142fs*28(0.31,422) | RB1_c.380+1delG_p.splice(0.27,511)                                             | none                                                                                                                  | none                        | none |
| 71 | Lymph Node | 703 | F | TP53_c.574C>T_p.Q192*(0.93,902)                                              | none                                                                           | none                                                                                                                  | RB1_loss(0, exons 27 of 27) | none |
| 72 | Lymph Node | 749 | F | TP53_c.814G>T_p.V272L(0.82,495)                                              | NCOR1_c.308C>G_p.S103*(0.76,467),<br>RB1_c.1499-                               | none                                                                                                                  | none                        | none |

|        |               |     |   |                                                                                                                        |                                                                                                                                           |                                                                                                             |                                          |      |
|--------|---------------|-----|---|------------------------------------------------------------------------------------------------------------------------|-------------------------------------------------------------------------------------------------------------------------------------------|-------------------------------------------------------------------------------------------------------------|------------------------------------------|------|
|        | Node          |     |   |                                                                                                                        | 45_1505AGGGTTAATATTTTCATAAATAGTTA<br>CTTTTTTTTTTCATTTTTAGGAAGTAC>T_p.s<br>plice(0.89,192)                                                 |                                                                                                             |                                          |      |
| 7<br>3 | Lung          | 677 | F | RB1_c.2092A>T_p.R698W(0.94,<br>483),<br>TP53_c.839G>T_p.R280I(0.96,1<br>124),<br>TP53_c.428T>C_p.V143A(0.93,1<br>334)  | LRP1B_c.5866G>T_p.E1956*(0.39,419),<br>SPEN_c.533T>A_p.L178*(0.41,627)                                                                    | none                                                                                                        | none                                     | none |
| 7<br>4 | Spine         | 780 | F | TP53_c.743G>A_p.R248Q(0.93,<br>495)                                                                                    | RB1_c.1209T>A_p.Y403*(0.88,396)                                                                                                           | none                                                                                                        | none                                     | none |
| 7<br>5 | Lung          | 714 | F | TP53_c.820G>T_p.V274F(0.9,66<br>0)                                                                                     | CREBBP_c.4876G>T_p.E1626*(0.87,432),<br>MLL2_c.1387_1387delG_p.E463fs*467(0.<br>44,1005),<br>NOTCH4_c.4887C>AA_p.T1630fs*26(0.46,<br>833) | KDM5A_a<br>mplificatio<br>n(7, exons<br>28 of 28)                                                           | APC_l<br>oss(0,<br>exons<br>10 of<br>15) | none |
| 7<br>6 | Lung          | 722 | F | KRAS_c.34G>A_p.G12S(0.42,78<br>3),<br>RB1_c.975T>A_p.Y325*(0.76,34<br>6),<br>TP53_c.854_855AG>TT_p.E285<br>V(0.75,503) | FBXW7_c.86_90TGAA>ATGA_p.D29f_E30<br>>Q*(0.19,949),<br>TSC2_c.1507C>T_p.Q503*(0.45,837)                                                   | none                                                                                                        | none                                     | none |
| 7<br>7 | Lung          | 700 | F | PBRM1_c.1955C>A_p.S652*(0.0<br>8,337),<br>TP53_c.473G>T_p.R158L(0.63,3<br>26)                                          | none                                                                                                                                      | RICTOR_a<br>mplificatio<br>n(11,<br>exons 39<br>of 39),<br>FGF10_am<br>plification(<br>11, exons 3<br>of 3) | none                                     | none |
| 7<br>8 | Lymph<br>Node | 847 | F | TP53_c.583A>T_p.I195F(0.47,71<br>7)                                                                                    | MLL2_c.1139_1139delC_p.T382fs*20(0.31<br>,755)                                                                                            | PDGFRA_a<br>mplificatio<br>n(9, exons                                                                       | none                                     | none |

|        |                     |     |   |                                                                                                                               |                                                                                                          |                                                                                                                                                                                                             |                                          |      |
|--------|---------------------|-----|---|-------------------------------------------------------------------------------------------------------------------------------|----------------------------------------------------------------------------------------------------------|-------------------------------------------------------------------------------------------------------------------------------------------------------------------------------------------------------------|------------------------------------------|------|
|        |                     |     |   |                                                                                                                               |                                                                                                          | 34 of 34),<br>KIT_amplifi<br>cation(14,<br>exons 21<br>of 21)                                                                                                                                               |                                          |      |
| 7<br>9 | Soft<br>Tissu<br>e  | 811 | M | none                                                                                                                          | TP53_c.342_343delGC_p.H115fs*33(0.74,<br>446)                                                            | none                                                                                                                                                                                                        | none                                     | none |
| 8<br>0 | Medi<br>astin<br>um | 741 | M | none                                                                                                                          | RB1_c.1675G>T_p.E559*(0.87,212),<br>TP53_c.97-<br>43_215delCTGAGGACCTG~GCTCCCCC_p.S<br>33fs*76(0.86,600) | none                                                                                                                                                                                                        | none                                     | none |
| 8<br>1 | Liver               | 659 | F | DNMT3A_c.2204A>G_p.Y735C(<br>0.02,737),<br>RB1_c.264G>T_p.L88F(0.72,269<br>),<br>TP53_c.380_380delC_p.P128fs*<br>42(0.68,357) | PTEN_c.1026+1delG_p.splice(0.71,237)                                                                     | MYCL1_am<br>plification(<br>25, exons 5<br>of 5)                                                                                                                                                            | none                                     | none |
| 8<br>2 | Lung                | 637 | F | TP53_c.469G>T_p.V157F(0.78,3<br>72)                                                                                           | none                                                                                                     | KDM5A_a<br>mplificatio<br>n(6, exons<br>28 of 28),<br>CCND2_am<br>plification(<br>6, exons 5<br>of 5),<br>FGF23_am<br>plification(<br>6, exons 3<br>of 3),<br>FGF6_ampl<br>ification(6,<br>exons 3 of<br>3) | RB1_l<br>oss(0,<br>exons<br>27 of<br>27) | none |



|    |      |     |   |                                                                                                         |                                                                                                                                                                         |                                                                                                                           |      |      |
|----|------|-----|---|---------------------------------------------------------------------------------------------------------|-------------------------------------------------------------------------------------------------------------------------------------------------------------------------|---------------------------------------------------------------------------------------------------------------------------|------|------|
| 83 | Lung | 618 | F | CREBBP_c.5034_5036delCTC_p.S1679del(0.6,1449),<br>TP53_c.814G>A_p.V272M(0.88,663)                       | RB1_c.376_376delA_p.l126fs*10(0.8,321)                                                                                                                                  | CCNE1_amplification(10, exons 10 of 10),<br>AKT2_amplification(7, exons 13 of 13)                                         | none | none |
| 84 | Lung | 575 | M | none                                                                                                    | ARID1A_c.175G>T_p.E59*(0.88,505),<br>TP53_c.920-2A>T_p.splice(0.81,494)                                                                                                 | RET_amplification(170, exons 20 of 20)                                                                                    | none | none |
| 85 | Lung | 866 | F | KRAS_c.34G>T_p.G12C(0.07,936),<br>TP53_c.404G>T_p.C135F(0.07,793)                                       | NOTCH3_c.6276_6276delG_p.A2093fs*56(0.09,597)                                                                                                                           | none                                                                                                                      | none | none |
| 86 | Lung | 658 | F | none                                                                                                    | RB1_c.1727C>G_p.S576*(0.39,786),<br>RB1_c.2306_2306delT_p.L769fs*41(0.36,645), TP53_c.96+1G>C_p.splice(0.83,897)                                                        | HRAS_amplification(50, exons 5 of 5),<br>EMSY_amplification(12, exons 20 of 20),<br>ARFRP1_amplification(6, exons 6 of 6) | none | none |
| 87 | Lung | 642 | M | EP300_c.2773C>A_p.P925T(0.16,465),<br>KRAS_c.37G>T_p.G13C(0.48,702),<br>TP53_c.859G>T_p.E287*(0.79,989) | NF1_c.2729_2729delG_p.G910fs*14(0.7,851),<br>NOTCH3_c.6612_6612delG_p.Q2205fs*41(0.26,619),<br>PIK3R2_c.1804g>T_p.E602*(0.17,738),<br>SPEN_c.1798g>T_p.E600*(0.48,429), | NKX2-1_amplification(7, exons 5 of 5),<br>GNAS_amp                                                                        | none | none |

|    |            |     |   |                                     |                                                                                                                                                       |                                                                                                                                                              |                              |                            |
|----|------------|-----|---|-------------------------------------|-------------------------------------------------------------------------------------------------------------------------------------------------------|--------------------------------------------------------------------------------------------------------------------------------------------------------------|------------------------------|----------------------------|
|    |            |     |   |                                     | WT1_c.85G>T_p.E29*(0.44,533)                                                                                                                          | lification(8, exons 15 of 15)                                                                                                                                |                              |                            |
| 88 | Liver      | 534 | F | none                                | none                                                                                                                                                  | CCND1_amplification(226, exons 5 of 5), FGF19_amplification(226, exons 3 of 3), MYCL1_amplification(18, exons 5 of 5), MET_amplification(85, exons 20 of 20) | none                         | none                       |
| 89 | Lymph Node | 764 | M | none                                | none                                                                                                                                                  | none                                                                                                                                                         | TSC1_loss(0, exons 15 of 21) | none                       |
| 90 | Lung       | 688 | F | GRIN2A_c.3787G>A_p.G1263R(0.24,818) | RB1_c.500+1G>T_p.splice(0.29,324), TP53_c.559+1G>T_p.splice(0.3,614)                                                                                  | none                                                                                                                                                         | NF1_loss(0, exons 15 of 59)  | none                       |
| 91 | Lung       | 694 | F | TP53_c.856G>T_p.E286*(0.87,549)     | KIT_c.1520_1521insCTATTTTAACTTTGC_p.A507_F508insYFNFA(0.19,934), MAP3K13_c.1305_1305delA_p.K435fs*16(0.62,932), MLL2_c.8828_8829insCT_p.N2944fs*61(0. | MCL1_amplification(9, exons 5 of 5), EPHA3_am                                                                                                                | none                         | ARID2_ARID2_duplication_48 |

|    |               |     |   |                                                                                                                                                |                                                                                                   |                                                                                                                                |      |      |
|----|---------------|-----|---|------------------------------------------------------------------------------------------------------------------------------------------------|---------------------------------------------------------------------------------------------------|--------------------------------------------------------------------------------------------------------------------------------|------|------|
|    |               |     |   |                                                                                                                                                | 42,942),<br>MLL2_c.6986_6986delC_p.L2331fs*1(0.44,603)                                            | plification(14, exons 17 of 17)                                                                                                |      |      |
| 92 | Head and Neck | 699 | M | CTNNB1_c.110C>G_p.S37C(0.68,566),<br>NFE2L2_c.53G>A_p.R18Q(0.71,700),<br>TP53_c.817C>T_p.R273C(0.28,1434),<br>TP53_c.473G>T_p.R158L(0.56,1530) | MLL2_c.5263C>T_p.Q1755*(0.48,867)                                                                 | ZNF703_amplification(12, exons 2 of 2),<br>FGFR1_amplification(12, exons 18 of 18),<br>MYST3_amplification(14, exons 16 of 16) | none | none |
| 93 | Liver         | 799 | M | TP53_c.892G>T_p.E298*(0.79,619)                                                                                                                | none                                                                                              | none                                                                                                                           | none | none |
| 94 | Lung          | 689 | M | ATM_c.566G>A_p.R189K(0.04,642)                                                                                                                 | TET2_c.1595T>A_p.L532*(0.06,759)                                                                  | none                                                                                                                           | none | none |
| 95 | Chest Wall    | 747 | F | EGFR_c.2235_2249delGGAATTAAGAGAAGC_p.E746_A750del(0.54,1127),<br>TP53_c.273G>A_p.W91*(0.9,552)                                                 | RAD50_c.2983_2986delGAAA_p.E995fs*2(0.28,635)                                                     | RICTOR_amplification(8, exons 39 of 39),<br>FGF10_amplification(8, exons 3 of 3)                                               | none | none |
| 96 | Lymph Node    | 763 | F | TP53_c.469G>T_p.V157F(0.98,616)                                                                                                                | BCOR_c.2029G>T_p.G677*(0.42,824),<br>KDM6A_c.4141G>T_p.E1381*(0.51,689)                           | none                                                                                                                           | none | none |
| 97 | Lung          | 594 | F | LRP1B_c.9021C>A_p.C3007*(0.58,493),<br>PTEN_c.511C>T_p.Q171*(0.03,511)                                                                         | LRP1B_c.10297_10297delG_p.E3433fs*85(0.56,412), LRP1B_c.3767-1G>T_p.splice(0.13,346), RB1_c.1128- | MYCL1_amplification(16, exons 5)                                                                                               | none | none |

|                |                                      |                                                           |                         |                                                                                                                                                                                                    |                                                                         |                                                                                                                                                                                                                 |                                                                           |                                                      |
|----------------|--------------------------------------|-----------------------------------------------------------|-------------------------|----------------------------------------------------------------------------------------------------------------------------------------------------------------------------------------------------|-------------------------------------------------------------------------|-----------------------------------------------------------------------------------------------------------------------------------------------------------------------------------------------------------------|---------------------------------------------------------------------------|------------------------------------------------------|
|                |                                      |                                                           |                         | 05),<br>TP53_c.627_627delA_p.N210fs<br>*37(0.69,516)                                                                                                                                               | 2A>T_p.splice(0.71,500)                                                 | of 5)                                                                                                                                                                                                           |                                                                           |                                                      |
| 9<br>8         | Lung                                 | 660                                                       | F                       | EGFR_c.2239_2256delTTAAGAG<br>AAGCAACATCT_p.L747_S752del<br>(0.33,787),<br>FBXW7_c.575A>C_p.E192A(0.25<br>,497),<br>PIK3CA_c.1633G>A_p.E545K(0.<br>13,637),<br>TP53_c.659A>G_p.Y220C(0.59,7<br>40) | none                                                                    | BCL2L2_a<br>mplificatio<br>n(6, exons<br>5 of 5),<br>NFKBIA_a<br>mplificatio<br>n(7, exons<br>6 of 6),<br>NKX2-<br>1_amplific<br>ation(7,<br>exons 5 of<br>5),<br>MCL1_amp<br>lification(7,<br>exons 5 of<br>5) | RB1_l<br>oss(0,<br>exons<br>26 of<br>27)                                  | none                                                 |
| <b>I<br/>D</b> | <b>TISS<br/>UE<br/>PROF<br/>ILED</b> | <b>ME<br/>DIA<br/>N<br/>EX<br/>ON<br/>DE<br/>PT<br/>H</b> | <b>GE<br/>ND<br/>ER</b> | <b>KNOWN SOMATIC SHORT-<br/>VARIANTS (PERCENT-<br/>READS,COVERAGE)</b>                                                                                                                             | <b>LIKELY INACTIVATING SHORT-VARIANTS<br/>(PERCENT-READS, COVERAGE)</b> | <b>HIGH-<br/>LEVEL<br/>(CN&gt;8)<br/>AND<br/>FOCAL<br/>(CN&gt;5)<br/>AMPLIFICA<br/>TIONS</b>                                                                                                                    | <b>HOM<br/>OZYG<br/>OUS<br/>DELETI<br/>ONS<br/>OF<br/>Know<br/>n TSGs</b> | <b>LIKELY<br/>FUNCTIONAL<br/>REARRANGEMEN<br/>TS</b> |
